# Supplementary material for: Worry about racial discrimination: A missing piece of the puzzle of Black-White disparities in preterm birth?
Source: PubMed Central journal article supplement (PMC5636124; doi:10.1371/journal.pone.0186151), 2017-10-11
Supplement: pone.0186151.s001.pdf [file pone.0186151.s001.pdf]

**S1 Table. Comparison of characteristics and PTB rates of U.S.-born non-Latino White and Black respondents and non-respondents to the MIHA survey, the final weighted sample, and the statewide target population of all eligible women giving birth in California, 2011-2014. Sources: Birth certificate data for U.S.-born non-Latino Black and White women.**

|                                  | Respondents<br>(unweighted)<br>(n=10,732) | Non-<br>respondents<br>(n=4,421) | Weighted<br>sample<br>(n=10,732) | Target<br>population<br>(n=589,511) |
|----------------------------------|-------------------------------------------|----------------------------------|----------------------------------|-------------------------------------|
| <b>Maternal age</b>              |                                           |                                  |                                  |                                     |
| 15-19                            | 5.3                                       | 7.1                              | 4.3                              | 4.6                                 |
| 20-24                            | 19.1                                      | 23.2                             | 17.8                             | 18.1                                |
| 25-29                            | 28.1                                      | 29.7                             | 28.1                             | 27.6                                |
| 30-34                            | 30.0                                      | 24.7                             | 30.6                             | 30.3                                |
| 35 or older                      | 17.5                                      | 15.4                             | 19.3                             | 19.5                                |
|                                  |                                           |                                  |                                  |                                     |
| <b>Maternal education</b>        |                                           |                                  |                                  |                                     |
| Less than high school graduate   | 7.5                                       | 12.2                             | 6.1                              | 6.7                                 |
| High school graduate/GED         | 23.0                                      | 30.7                             | 21.7                             | 22.4                                |
| Some college                     | 33.1                                      | 34.4                             | 32.4                             | 31.7                                |
| College graduate                 | 36.4                                      | 22.8                             | 39.8                             | 39.2                                |
|                                  |                                           |                                  |                                  |                                     |
| <b>Delivery payer</b>            |                                           |                                  |                                  |                                     |
| Medi-Cal                         | 38.7                                      | 48.0                             | 28.9                             | 29.2                                |
| Private insurance                | 55.0                                      | 44.5                             | 63.7                             | 62.5                                |
| Military                         | 1.3                                       | 1.7                              | 1.3                              | 1.3                                 |
| Other                            | 1.8                                       | 2.2                              | 4.3                              | 5.1                                 |
| Uninsured/Self-pay               | 3.1                                       | 3.6                              | 1.9                              | 1.9                                 |
|                                  |                                           |                                  |                                  |                                     |
| <b>WIC program participation</b> |                                           |                                  |                                  |                                     |
| Received WIC during pregnancy    | 33.3                                      | 29.8                             | 32.5                             | 33.9                                |
| Did not receive WIC              | 66.7                                      | 70.2                             | 67.5                             | 66.1                                |
|                                  |                                           |                                  |                                  |                                     |
| <b>Preterm birth</b>             |                                           |                                  |                                  |                                     |
| Yes                              | 8.1                                       | 9.2                              | 7.5                              | 7.6                                 |
| No                               | 91.9                                      | 90.8                             | 92.5                             | 92.4                                |
|                                  |                                           |                                  |                                  |                                     |
| <b>Race/ethnicity</b>            |                                           |                                  |                                  |                                     |
| White, non-Latino                | 78.6                                      | 74.4                             | 83.0                             | 82.9                                |
| Black, non-Latino                | 21.4                                      | 25.6                             | 17.0                             | 17.1                                |
