# Supplementary material for: Worry about racial discrimination: A missing piece of the puzzle of Black-White disparities in preterm birth?
Source: PubMed Central journal article supplement (PMC5636124; doi:10.1371/journal.pone.0186151), 2017-10-11
Supplement: pone.0186151.s002.pdf [file pone.0186151.s002.pdf]

**S2 Table. Rates of chronic worry about racial discrimination and preterm birth, including and excluding records with any missing covariates, U.S.-born non-Latino Black and White women with singleton births in California, MIHA 2011-2014.**

|                                              | U.S.-born Black women  |                                                                   | U.S.-born White women  |                                                                   |
|----------------------------------------------|------------------------|-------------------------------------------------------------------|------------------------|-------------------------------------------------------------------|
|                                              | All women<br>(n=2,201) | Excluding those<br>with any<br>missing<br>covariates<br>(n=1,986) | All women<br>(n=8,122) | Excluding those<br>with any<br>missing<br>covariates<br>(n=7,712) |
| Preterm birth rate                           | 9.2 (7.2-11.2)         | 9.6 (7.4-11.7)                                                    | 5.8 (4.8-6.8)          | 5.4 (4.5-6.4)                                                     |
| Among women reporting<br>chronic worry       | 12.5 (8.4-16.7)        | 13.8 (9.1-18.5)                                                   | 9.9 (2.6-17.1)         | 9.5 (1.9-17.1)                                                    |
| Among women not<br>reporting chronic worry   | 7.2 (5.3-9.2)          | 7.1 (5.0-9.2)                                                     | 7.2 (4.6-6.5)          | 5.2 (4.3-6.1)                                                     |
| Rate of worry about racial<br>discrimination | 36.9 (32.9-40.9)       | 36.2 (32.2-40.3)                                                  | 5.5 (4.5-6.5)          | 5.2 (4.3-6.1)                                                     |
