# Supplementary material for: Worry about racial discrimination: A missing piece of the puzzle of Black-White disparities in preterm birth?
Source: PubMed Central journal article supplement (PMC5636124; doi:10.1371/journal.pone.0186151), 2017-10-11
Supplement: pone.0186151.s003.pdf [file pone.0186151.s003.pdf]

**S3 Table. Prevalence of preterm births overall, by whether women reported chronic worry about racial discrimination (chronic worry), and by each covariate, among U.S.-born non-Latino Black and White women with singleton live births in California, MIHA 2011-2014.**

|                                                                    | U.S.-born Black women<br>(n=2,201) |                       | U.S.-born White women<br>(n=8,122) |                    |
|--------------------------------------------------------------------|------------------------------------|-----------------------|------------------------------------|--------------------|
|                                                                    | N Preterm                          | % Preterm<br>(95% CI) | N Preterm                          | % Preterm (95% CI) |
| <b>Overall preterm birth rate</b>                                  | 234                                | 9.2 (7.2-11.2)        | 492                                | 5.8 (4.8-6.8)      |
| Reported chronic worry                                             | 105                                | 12.5 (8.4-16.7)       | 30                                 | 9.9 (2.6-17.1)     |
| Did not report chronic worry                                       | 129                                | 7.2 (5.3-9.2)         | 462                                | 5.6 (4.6-6.5)      |
| <b>Covariates</b>                                                  |                                    |                       |                                    |                    |
| <i>Social/demographic factors</i>                                  |                                    |                       |                                    |                    |
| Maternal age                                                       |                                    |                       |                                    |                    |
| 15-19                                                              | 23                                 | 9.3 (2.4-16.2)        | 20                                 | 5.2 (2.1-8.3)      |
| 20-24                                                              | 55                                 | 7.6 (4.6-10.6)        | 91                                 | 7.0 (3.9-10.0)     |
| 25-29                                                              | 51                                 | 5.9 (3.6-8.3)         | 137                                | 5.2 (3.9-6.5)      |
| 30-34                                                              | 71                                 | 15.0 (8.7-21.3)       | 132                                | 4.6 (3.1-6.0)      |
| 35+                                                                | 34                                 | 10.3 (4.6-16.1)       | 112                                | 7.8 (4.9-10.8)     |
| Parity                                                             |                                    |                       |                                    |                    |
| Primiparous                                                        | 81                                 | 7.1 (4.9-9.3)         | 248                                | 7.2 (5.4-9.0)      |
| 2-3 births                                                         | 102                                | 10.1 (6.9-13.3)       | 194                                | 4.1 (3.1-5.1)      |
| 4+ births                                                          | 51                                 | 12.4 (5.6-19.3)       | 50                                 | 8.7 (5.2-12.3)     |
| Marital status                                                     |                                    |                       |                                    |                    |
| Married                                                            | 60                                 | 9.1 (5.5-12.7)        | 301                                | 5.1 (4.0-6.2)      |
| Living with a partner                                              | 73                                 | 10.0 (5.4-14.6)       | 118                                | 7.1 (5.0-9.1)      |
| Single, separated,<br>divorced, widowed                            | 99                                 | 8.8 (6.2-11.4)        | 72                                 | 8.8 (4.3-13.3)     |
| Family income                                                      |                                    |                       |                                    |                    |
| <=100% poverty                                                     | 142                                | 7.9 (5.9-10.0)        | 145                                | 6.6 (4.7-8.5)      |
| 101-200%                                                           | 45                                 | 11.5 (5.2-17.8)       | 95                                 | 6.6 (3.7-9.5)      |
| >200%                                                              | 43                                 | 11.6 (6.2-16.9)       | 250                                | 5.3 (4.1-6.6)      |
| Education                                                          |                                    |                       |                                    |                    |
| Less than high school                                              | 39                                 | 10.3 (5.5-15.0)       | 32                                 | 4.2 (2.0-6.4)      |
| High school/GED                                                    | 57                                 | 9.7 (5.5-13.9)        | 85                                 | 8.8 (4.8-12.7)     |
| Some college                                                       | 98                                 | 8.1 (5.0-11.1)        | 201                                | 6.3 (4.7-7.9)      |
| College graduate                                                   | 40                                 | 10.7 (5.5-15.8)       | 174                                | 4.8 (3.5-6.1)      |
| Percent of census-tract residents with incomes below poverty level |                                    |                       |                                    |                    |

|                                                    |     |                 |     |                 |
|----------------------------------------------------|-----|-----------------|-----|-----------------|
| <5%                                                | 21  | 21.3 (9.2-33.3) | 60  | 4.2 (2.1-6.3)   |
| 5-<10%                                             | 27  | 13.4 (3.7-23.1) | 141 | 5.9 (4.1-7.8)   |
| 10-<20%                                            | 71  | 7.3 (4.7-9.9)   | 163 | 6.0 (4.3-7.8)   |
| >20%                                               | 113 | 8.3 (5.9-10.7)  | 126 | 6.8 (4.6-9.0)   |
| <b>Number of major stressors during pregnancy</b>  |     |                 |     |                 |
| 0                                                  | 83  | 8.6 (5.5-11.6)  | 291 | 5.6 (4.4-6.8)   |
| 1                                                  | 67  | 11.6 (6.1-17.1) | 96  | 5.4 (3.5-7.4)   |
| 2-3                                                | 53  | 7.7 (4.7-10.7)  | 66  | 6.8 (3.2-10.4)  |
| 4 or more                                          | 25  | 9.8 (4.3-15.3)  | 34  | 5.9 (3.3-8.5)   |
| <b>Depressive symptoms during pregnancy</b>        |     |                 |     |                 |
| Yes                                                | 65  | 7.6 (4.6-10.5)  | 73  | 6.2 (3.9-8.5)   |
| No                                                 | 168 | 9.6 (7.2-12.0)  | 418 | 5.8 (4.7-6.8)   |
| <b><i>Behavioral factors</i></b>                   |     |                 |     |                 |
| <b>Smoked in the 3 months pre-pregnancy</b>        |     |                 |     |                 |
| Yes                                                | 63  | 10.1 (6.2-14.0) | 130 | 7.5 (4.7-10.2)  |
| No                                                 | 171 | 9.2 (6.8-11.5)  | 360 | 5.4 (4.4-6.5)   |
| <b>Binge drank during pregnancy</b>                |     |                 |     |                 |
| Yes                                                | 11  | 9.8 (1.3-18.3)  | 39  | 13.1 (6.3-19.9) |
| No                                                 | 219 | 9.3 (7.2-11.4)  | 449 | 5.3 (4.3-6.2)   |
| <b>Unintended pregnancy</b>                        |     |                 |     |                 |
| Yes <sup>a</sup>                                   | 141 | 8.8 (6.2-11.4)  | 204 | 6.5 (4.8-8.2)   |
| No <sup>b</sup>                                    | 91  | 10.0 (6.8-13.2) | 284 | 5.2 (4.0-6.3)   |
| <b><i>Medical/medical care factors</i></b>         |     |                 |     |                 |
| <b>Lacked first-trimester prenatal care</b>        |     |                 |     |                 |
| Yes                                                | 43  | 11.4 (6.1-16.8) | 67  | 8.8 (4.9-12.7)  |
| No                                                 | 191 | 8.8 (6.6-10.9)  | 425 | 5.5 (4.5-6.6)   |
| <b>Interpregnancy interval (multiparous women)</b> |     |                 |     |                 |
| <6 months                                          | 5   | 12.5 (0.0-27.8) | 12  | 5.2 (1.0-9.4)   |
| 6-11 months                                        | 20  | 12.7 (3.0-22.4) | 28  | 3.9 (1.8-6.0)   |
| 12-23 months                                       | 24  | 7.2 (2.9-11.6)  | 62  | 4.0 (2.1-5.8)   |
| 24+ months                                         | 101 | 11.1 (7.2-15.0) | 139 | 5.2 (3.8-6.6)   |
| <b>Self-reported health pre-pregnancy</b>          |     |                 |     |                 |

|                                      |     |                  |     |                 |
|--------------------------------------|-----|------------------|-----|-----------------|
| Poor or fair                         | 42  | 14.9 (7.9-22.0)  | 39  | 13.1 (6.4-19.7) |
| Good, very good, or excellent        | 191 | 8.6 (6.5-10.6)   | 453 | 5.5 (4.5-6.5)   |
| Diabetes diagnosis pre-pregnancy     |     |                  |     |                 |
| Yes                                  | 22  | 29.2 (12.9-45.5) | 17  | 15.7 (5.6-25.7) |
| No                                   | 206 | 8.8 (6.7-10.8)   | 470 | 5.7 (4.7-6.7)   |
| Hypertension diagnosis pre-pregnancy |     |                  |     |                 |
| Yes                                  | 42  | 28.3 (12.8-43.7) | 31  | 8.4 (3.9-13.0)  |
| No                                   | 188 | 8.0 (6.2-9.9)    | 455 | 5.7 (4.7-6.7)   |
| Underweight (BMI<18.5) pre-pregnancy |     |                  |     |                 |
| Yes                                  | 10  | 11.7 (2.4-21.0)  | 23  | 7.0 (2.3-11.7)  |
| No                                   | 223 | 9.1 (7.1-11.2)   | 468 | 5.8 (4.7-6.8)   |
| Pregnancy weight gain                |     |                  |     |                 |
| Inadequate                           | 62  | 14.3 (8.5-20.2)  | 92  | 5.9 (3.8-8.0)   |
| Adequate or excessive                | 170 | 8.0 (6.0-10.1)   | 397 | 5.6 (4.6-6.6)   |

\*Chronic worry about racial discrimination (“chronic worry”) was defined as responding “very often” or “somewhat often” to the question: “Overall during your life until now, how often have you worried that you might be treated or judged unfairly because of your race or ethnic group.”

Note: This table includes the information in Table 2 and in addition displays the prevalence of preterm birth by each covariate.
