# Supplementary material for: Worry about racial discrimination: A missing piece of the puzzle of Black-White disparities in preterm birth?
Source: PubMed Central journal article supplement (PMC5636124; doi:10.1371/journal.pone.0186151), 2017-10-11
Supplement: pone.0186151.s004.pdf [file pone.0186151.s004.pdf]

**S4 Table. Prevalence ratios for preterm birth associated with chronic worry about racial discrimination among U.S.-born Black women and White women with singleton live births in California, MIHA 2011-2014.**

| Variables included in model                                                                          | Prevalence ratio (and 95% CI) for PTB among women who reported chronic worry about racial discrimination relative to those who did not |                                 |
|------------------------------------------------------------------------------------------------------|----------------------------------------------------------------------------------------------------------------------------------------|---------------------------------|
|                                                                                                      | U.S.-born Black women (n=2,201)                                                                                                        | U.S.-born White women (n=8,122) |
| Chronic worry about racial discrimination (unadjusted)                                               | 1.73 (1.12-2.67)                                                                                                                       | 1.77 (0.83-3.77)                |
| Chronic worry about racial discrimination, adjusted for social and demographic covariates            | 1.95 (1.27-2.97)                                                                                                                       | 1.67 (0.73-3.79)                |
| <i>Social/demographic covariates:</i>                                                                |                                                                                                                                        |                                 |
| Age (ref: 35+)                                                                                       |                                                                                                                                        |                                 |
| 15-19                                                                                                | 1.35 (0.43-4.22)                                                                                                                       | 0.37 (0.14-0.98)                |
| 20-24                                                                                                | 1.04 (0.47-2.28)                                                                                                                       | 0.59 (0.28-1.27)                |
| 25-34                                                                                                | 1.03 (0.55-1.93)                                                                                                                       | 0.59 (0.39-0.89)                |
| Parity (ref: 2-3 births)                                                                             |                                                                                                                                        |                                 |
| Primiparous                                                                                          | 0.71 (0.39-1.29)                                                                                                                       | 1.79 (1.22-2.61)                |
| 4+ births                                                                                            | 1.59 (0.94-2.68)                                                                                                                       | 1.92 (1.19-3.10)                |
| Marital status (ref: Married)                                                                        |                                                                                                                                        |                                 |
| Living with a partner                                                                                | 1.47 (0.84-2.59)                                                                                                                       | 1.42 (0.98-2.08)                |
| Single, separated, divorced, widowed                                                                 | 1.48 (0.86-2.53)                                                                                                                       | 1.85 (1.05-3.26)                |
| Family income (ref: 200% poverty+)                                                                   |                                                                                                                                        |                                 |
| <=100% poverty                                                                                       | 0.68 (0.38-1.21)                                                                                                                       | 0.92 (0.54-1.57)                |
| 101-200% poverty                                                                                     | 1.05 (0.57-1.95)                                                                                                                       | 0.98 (0.62-1.54)                |
| Education (ref: College graduate)                                                                    |                                                                                                                                        |                                 |
| Less than high school graduate                                                                       | 1.14 (0.54-2.42)                                                                                                                       | 0.83 (0.41-1.70)                |
| High school graduate/GED                                                                             | 1.13 (0.59-2.14)                                                                                                                       | 1.62 (0.85-3.07)                |
| Some college                                                                                         | 0.78 (0.43-1.4)                                                                                                                        | 1.33 (0.89-1.98)                |
| Neighborhood poverty (ref: <5%)                                                                      |                                                                                                                                        |                                 |
| 5-9.9%                                                                                               | 0.71 (0.32-1.59)                                                                                                                       | 1.33 (0.75-2.38)                |
| 10-19.9%                                                                                             | 0.37 (0.18-0.77)                                                                                                                       | 1.23 (0.71-2.11)                |
| >=20%                                                                                                | 0.49 (0.26-0.93)                                                                                                                       | 1.44 (0.78-2.67)                |
| Number of stressors (ref: 0)                                                                         |                                                                                                                                        |                                 |
| 1                                                                                                    | 1.27 (0.78-2.07)                                                                                                                       | 0.83 (0.55-1.25)                |
| 2-3                                                                                                  | 0.89 (0.52-1.51)                                                                                                                       | 0.91 (0.55-1.51)                |
| 4 or more                                                                                            | 1.08 (0.51-2.30)                                                                                                                       | 0.63 (0.34-1.19)                |
| Depression during pregnancy (ref: no)                                                                |                                                                                                                                        |                                 |
| Yes                                                                                                  | 0.66 (0.40-1.09)                                                                                                                       | 1.03 (0.65-1.63)                |
| Chronic worry about racial discrimination and social/demographic, behavioral, and medical covariates | 2.00 (1.33-3.01)                                                                                                                       | 1.84 (0.91-3.71)                |

|                                                                         |                  |                  |
|-------------------------------------------------------------------------|------------------|------------------|
| <i>Social/demographic covariates:</i>                                   |                  |                  |
| Age (ref: 35+)                                                          |                  |                  |
| 15-19                                                                   | 1.38 (0.53-3.59) | 0.38 (0.14-1.03) |
| 20-24                                                                   | 1.02 (0.48-2.20) | 0.61 (0.30-1.22) |
| 25-34                                                                   | 0.97 (0.52-1.80) | 0.56 (0.37-0.86) |
| Parity (ref: 2-3 births)                                                |                  |                  |
| Primiparous                                                             | 0.76 (0.43-1.34) | 1.69 (1.14-2.52) |
| 4+ births                                                               | 1.44 (0.85-2.43) | 1.77 (1.10-2.85) |
| Marital status (ref: Married)                                           |                  |                  |
| Living with a partner                                                   | 1.44 (0.89-2.33) | 1.56 (1.08-2.26) |
| Single, separated, divorced, widowed                                    | 1.27 (0.75-2.13) | 1.96 (1.10-3.48) |
| Family income (ref: 200% poverty+)                                      |                  |                  |
| <=100% poverty                                                          | 0.79 (0.42-1.49) | 0.79 (0.48-1.31) |
| 101-200% poverty                                                        | 1.18 (0.61-2.28) | 1.02 (0.66-1.59) |
| Education (ref: College graduate)                                       |                  |                  |
| Less than high school graduate                                          | 0.98 (0.45-2.15) | 0.80 (0.38-1.66) |
| High school graduate/GED                                                | 1.07 (0.54-2.11) | 1.53 (0.80-2.92) |
| Some college                                                            | 0.80 (0.44-1.47) | 1.33 (0.91-1.94) |
| Neighborhood poverty (ref: <5%)                                         |                  |                  |
| 5-9.9%                                                                  | 0.65 (0.32-1.33) | 1.77 (1.13-2.79) |
| 10-19.9%                                                                | 0.38 (0.20-0.71) | 1.55 (1.01-2.39) |
| >=20%                                                                   | 0.48 (0.27-0.83) | 1.73 (0.99-3.00) |
| Number of stressors (ref: 0)                                            |                  |                  |
| 1                                                                       | 1.04 (0.65-1.67) | 0.88 (0.59-1.31) |
| 2-3                                                                     | 0.81 (0.47-1.40) | 0.88 (0.53-1.47) |
| 4 or more                                                               | 0.88 (0.39-2.02) | 0.79 (0.46-1.36) |
| Depression during pregnancy (ref: no)                                   |                  |                  |
| Yes                                                                     | 0.62 (0.35-1.09) | 0.95 (0.62-1.45) |
| <i>Behavioral covariates:</i>                                           |                  |                  |
| Smoking in 3 months before pregnancy (ref: no)                          |                  |                  |
| Yes                                                                     | 1.08 (0.62-1.88) | 0.95 (0.64-1.41) |
| Binge drinking during pregnancy (ref: no)                               |                  |                  |
| Yes                                                                     | 1.07 (0.49-2.38) | 2.10 (1.21-3.64) |
| Unintended pregnancy (ref: no)                                          |                  |                  |
| Yes                                                                     | 0.76 (0.48-1.19) | 0.83 (0.58-1.19) |
| <i>Medical covariates:</i>                                              |                  |                  |
| Lacked first-trimester prenatal care (ref: no)                          |                  |                  |
| Yes                                                                     | 1.23 (0.73-2.09) | 1.31 (0.81-2.11) |
| Interpregnancy interval (ref: 24+ months or primiparous)                |                  |                  |
| <6 months                                                               | 1.03 (0.34-3.07) | 1.28 (0.56-2.90) |
| 6-11 months                                                             | 1.28 (0.61-2.67) | 0.95 (0.53-1.72) |
| 12-23 months                                                            | 0.66 (0.32-1.35) | 1.01 (0.60-1.69) |
| Self-reported health pre-pregnancy (ref: good, very good, or excellent) |                  |                  |
| Fair or poor                                                            | 1.75 (1.05-2.91) | 1.47 (0.89-2.41) |
| Diabetes diagnosis pre-pregnancy (ref:                                  |                  |                  |

|                                                                    |                  |                  |
|--------------------------------------------------------------------|------------------|------------------|
| no)                                                                |                  |                  |
| Yes                                                                | 2.04 (0.95-4.40) | 2.47 (1.13-5.41) |
| Hypertension diagnosis pre-pregnancy<br>(ref: no)                  |                  |                  |
| Yes                                                                | 2.54 (1.42-4.53) | 1.01 (0.45-2.22) |
| Underweight (BMI<18.5) pre-pregnancy<br>(ref: no, BMI $\geq$ 18.5) |                  |                  |
| Yes                                                                | 1.67 (0.80-3.48) | 1.31 (0.64-2.66) |
| Inadequate weight gain (ref: adequate or<br>excessive)             |                  |                  |
| Yes                                                                | 1.64 (1.06-2.54) | 0.95 (0.65-1.37) |

Note: This table includes the information in Table 3 and in addition displays the prevalence ratios associated with each covariate in the models.
