# Supplementary material for: Worry about racial discrimination: A missing piece of the puzzle of Black-White disparities in preterm birth?
Source: PubMed Central journal article supplement (PMC5636124; doi:10.1371/journal.pone.0186151), 2017-10-11
Supplement: pone.0186151.s005.pdf [file pone.0186151.s005.pdf]

**S5 Table. Prevalence ratios comparing PTB prevalence among U.S.-born non-Latino Black relative to White women with singleton live births in California, before and after adjustment for chronic worry about racial discrimination and covariates, MIHA 2011-2014.**

| Variables included in model                                                                             | Prevalence ratio<br>(and 95% CI) for PTB among<br>Black relative to White women |
|---------------------------------------------------------------------------------------------------------|---------------------------------------------------------------------------------|
| Racial group: U.S.-born Black (unadjusted); ref=U.S.-born White                                         | 1.59 (1.21-2.09)                                                                |
| Racial group (adjusted for chronic worry about racial discrimination)                                   | 1.30 (0.93-1.81)                                                                |
| Chronic worry about racial discrimination                                                               | 1.76 (1.13-2.73)                                                                |
| Racial group (adjusted for chronic worry about racial discrimination and social/demographic covariates) | 1.08 (0.76-1.54)                                                                |
| Chronic worry about racial discrimination                                                               | 1.83 (1.17-2.88)                                                                |
| <i>Social/demographic covariates:</i>                                                                   |                                                                                 |
| Age (ref: 35+)                                                                                          |                                                                                 |
| 15-19                                                                                                   | 0.51 (0.22-1.17)                                                                |
| 20-24                                                                                                   | 0.62 (0.32-1.18)                                                                |
| 25-34                                                                                                   | 0.63 (0.43-0.92)                                                                |
| Parity (ref: 2-3 births)                                                                                |                                                                                 |
| Primiparous                                                                                             | 1.48 (1.05-2.07)                                                                |
| 4+ births                                                                                               | 1.83 (1.23-2.74)                                                                |
| Marital status (ref: Married)                                                                           |                                                                                 |
| Living with a partner                                                                                   | 1.49 (1.07-2.08)                                                                |
| Single, separated, divorced, widowed                                                                    | 1.70 (1.09-2.66)                                                                |
| Family income (ref: 200% poverty+)                                                                      |                                                                                 |
| <=100% poverty                                                                                          | 0.80 (0.52-1.24)                                                                |
| 101-200% poverty                                                                                        | 1.02 (0.69-1.51)                                                                |
| Education (ref: College graduate)                                                                       |                                                                                 |
| Less than high school graduate                                                                          | 1.16 (0.68-2.00)                                                                |
| High school graduate/GED                                                                                | 1.57 (0.93-2.67)                                                                |
| Some college                                                                                            | 1.23 (0.86-1.76)                                                                |
| Neighborhood poverty (ref: <5%)                                                                         |                                                                                 |
| 5-9.9%                                                                                                  | 1.26 (0.76-2.08)                                                                |
| 10-19.9%                                                                                                | 1.04 (0.64-1.68)                                                                |
| >=20%                                                                                                   | 1.20 (0.71-2.02)                                                                |
| Number of stressors (ref: 0)                                                                            |                                                                                 |
| 1                                                                                                       | 0.96 (0.69-1.34)                                                                |
| 2-3                                                                                                     | 0.93 (0.61-1.42)                                                                |
| 4 or more                                                                                               | 0.79 (0.49-1.28)                                                                |
| Depression during pregnancy (ref: no)                                                                   |                                                                                 |
| Yes                                                                                                     | 0.88 (0.61-1.26)                                                                |

|                                                                                    |                  |
|------------------------------------------------------------------------------------|------------------|
| Racial group (adjusted for social/demographic, behavioral, and medical covariates) | 1.17 (0.85-1.63) |
| Chronic worry about racial discrimination                                          | 1.98 (1.31-2.99) |
| <i>Social/demographic covariates:</i>                                              |                  |
| Age (ref: 35+)                                                                     |                  |
| 15-19                                                                              | 0.55 (0.24-1.26) |
| 20-24                                                                              | 0.65 (0.35-1.19) |
| 25-34                                                                              | 0.62 (0.42-0.92) |
| Parity (ref: 2-3 births)                                                           |                  |
| Primiparous                                                                        | 1.39 (0.98-1.97) |
| 4+ births                                                                          | 1.71 (1.16-2.52) |
| Marital status (ref: Married)                                                      |                  |
| Living with a partner                                                              | 1.62 (1.18-2.23) |
| Single, separated, divorced, widowed                                               | 1.70 (1.06-2.71) |
| Family income (ref: 200% poverty+)                                                 |                  |
| <=100% poverty                                                                     | 0.74 (0.49-1.11) |
| 101-200% poverty                                                                   | 1.06 (0.72-1.56) |
| Education (ref: College graduate)                                                  |                  |
| Less than high school graduate                                                     | 1.07 (0.60-1.91) |
| High school graduate/GED                                                           | 1.49 (0.87-2.57) |
| Some college                                                                       | 1.22 (0.87-1.72) |
| Neighborhood poverty (ref: <5%)                                                    |                  |
| 5-9.9%                                                                             | 1.55 (1.03-2.33) |
| 10-19.9%                                                                           | 1.25 (0.85-1.85) |
| >=20%                                                                              | 1.34 (0.84-2.13) |
| Number of stressors (ref: 0)                                                       |                  |
| 1                                                                                  | 0.98 (0.71-1.36) |
| 2-3                                                                                | 0.90 (0.59-1.39) |
| 4 or more                                                                          | 0.81 (0.51-1.30) |
| Depression during pregnancy (ref: no)                                              |                  |
| Yes                                                                                | 0.81 (0.58-1.15) |
| <i>Behavioral covariates:</i>                                                      |                  |
| Smoking in 3 months before pregnancy (ref: no)                                     |                  |
| Yes                                                                                | 0.99 (0.71-1.38) |
| Binge drinking during pregnancy (ref: no)                                          |                  |
| Yes                                                                                | 1.90 (1.16-3.12) |
| Unintended pregnancy (ref: no)                                                     |                  |
| Yes                                                                                | 0.83 (0.61-1.12) |
| <i>Medical covariates:</i>                                                         |                  |
| Lacked first-trimester prenatal care (ref: no)                                     |                  |
| Yes                                                                                | 1.23 (0.85-1.79) |
| Interpregnancy interval (ref: 24+ months or primiparous)                           |                  |
| <6 months                                                                          | 1.30 (0.63-2.71) |
| 6-11 months                                                                        | 1.06 (0.65-1.74) |
| 12-23 months                                                                       | 0.88 (0.57-1.38) |
| Self-reported health pre-pregnancy (ref:                                           |                  |

|                                                                 |                  |
|-----------------------------------------------------------------|------------------|
| good, very good, or excellent)                                  |                  |
| Fair or poor                                                    | 1.55 (1.06-2.26) |
| Diabetes diagnosis pre-pregnancy (ref: no)                      |                  |
| Yes                                                             | 2.27 (1.25-4.11) |
| Hypertension diagnosis pre-pregnancy (ref: no)                  |                  |
| Yes                                                             | 1.63 (0.95-2.78) |
| Underweight (BMI<18.5) pre-pregnancy (ref: no, BMI $\geq$ 18.5) |                  |
| Yes                                                             | 1.40 (0.81-2.43) |
| Inadequate weight gain (ref: adequate or excessive)             |                  |
| Yes                                                             | 1.17 (0.87-1.59) |

Note: This table includes the information in Table 4 and in addition displays the prevalence ratio for preterm birth among Black women relative to White women, by each covariate.
