# Supplementary material for: Worry about racial discrimination: A missing piece of the puzzle of Black-White disparities in preterm birth?
Source: PubMed Central journal article supplement (PMC5636124; doi:10.1371/journal.pone.0186151), 2017-10-11
Supplement: pone.0186151.s006.pdf [file pone.0186151.s006.pdf]

**S6 Table. Prevalence ratios comparing PTB prevalence among U.S.-born non-Latino Black relative to White women with singleton live births in California, before and after adjustment for chronic worry about racial discrimination, showing the results in Table 4 along with results associated with adjusting only for chronic worry and the behavioral/medical variables, MIHA 2011-2014.**

| Variables included in model                                                                             | Prevalence ratio<br>(and 95% CI) for PTB among<br>Black relative to White women |
|---------------------------------------------------------------------------------------------------------|---------------------------------------------------------------------------------|
| Racial group: U.S.-born Black (unadjusted); ref=U.S.-born White                                         | 1.59 (1.21-2.09)                                                                |
| Racial group (adjusted for chronic worry about racial discrimination)                                   | 1.30 (0.93-1.81)                                                                |
| Racial group (adjusted for chronic worry about racial discrimination and behavioral/medical covariates) | 1.29 (0.94-1.75)                                                                |
| Racial group (adjusted for chronic worry about racial discrimination and social/demographic covariates) | 1.08 (0.76-1.54)                                                                |
| Racial group (adjusted for social/demographic, behavioral, and medical covariates)                      | 1.17 (0.85-1.63)                                                                |
