# Supplementary material for: Worry about racial discrimination: A missing piece of the puzzle of Black-White disparities in preterm birth?
Source: PubMed Central journal article supplement (PMC5636124; doi:10.1371/journal.pone.0186151), 2017-10-11
Supplement: pone.0186151.s007.pdf [file pone.0186151.s007.pdf]

**S7 Table. P-values from chi-square tests for association between maternal stressors and preterm birth, U.S.-born non-Latino Black and White women with singleton live births in California, MIHA 2011-2014.**

|                                                                   | U.S.-born Black women<br>(n=2,201) | U.S.-born White women<br>(n=8,122) |
|-------------------------------------------------------------------|------------------------------------|------------------------------------|
| Separation or divorce during pregnancy                            | 0.576                              | 0.116                              |
| Had to move due to difficulty paying rent or mortgage             | 0.803                              | 0.995                              |
| Homeless or housing insecure                                      | 0.207                              | 0.020                              |
| Respondent or partner lost job                                    | 0.730                              | 0.866                              |
| Respondent or partner had pay or hours cut                        | 0.345                              | 0.581                              |
| Respondent or partner went to jail                                | 0.076                              | 0.753                              |
| Someone close to respondent had a serious drug or alcohol problem | 0.687                              | 0.528                              |
| Intimate partner violence during pregnancy                        | 0.668                              | 0.412                              |
| Food insecurity during pregnancy                                  | 0.331                              | 0.019                              |
