# Supplementary material for: Worry about racial discrimination: A missing piece of the puzzle of Black-White disparities in preterm birth?
Source: PubMed Central journal article supplement (PMC5636124; doi:10.1371/journal.pone.0186151), 2017-10-11
Supplement: pone.0186151.s008.pdf [file pone.0186151.s008.pdf]

**S8 Table. Rates of preterm birth and chronic worry about racial discrimination, according to detailed maternal race and partner race, among U.S.-born non-Latino White women with singleton live births in California, MIHA 2011-2014.**

| Among U.S.-born White women in the sample:                                                                   | Percentage (N)    | Preterm birth rate | Percent reporting chronic worry about discrimination |
|--------------------------------------------------------------------------------------------------------------|-------------------|--------------------|------------------------------------------------------|
| <b>Maternal race</b>                                                                                         |                   |                    |                                                      |
| Reported White only                                                                                          | 96.7<br>(n=7,698) | 5.8 (4.8-6.8)      | 5.3 (4.3-6.3)                                        |
| Reported White (first race) and Black as second or third race                                                | 0.6<br>(n=71)     | 3.7 (0.0-8.1)      | 20.1 (8.5-31.7)                                      |
| Reported White ( as first race) and another racial/ethnic group(s) as second or third race                   | 2.7<br>(n=353)    | 5.1 (2.4-7.8)      | 8.6 (4.6-12.6)                                       |
| <b>Paternal race</b>                                                                                         |                   |                    |                                                      |
| White only, non-Latino                                                                                       | 73.1<br>(n=5,886) | 5.6 (4.4-6.8)      | 4.8 (3.6-5.9)                                        |
| Black (1 <sup>st</sup> , 2 <sup>nd</sup> , or 3 <sup>rd</sup> race) (includes Latino and non-Latino fathers) | 2.8<br>(n=281)    | 4.7 (1.8-7.6)      | 15.0 (6.9-23.2)                                      |
| Other racial/ethnic group(s) or missing paternal race/ethnicity                                              | 24.1<br>(n=1,955) | 6.5 (4.7-8.3)      | 6.6 (4.6-8.6)                                        |
